# Supplementary material
Source: PubMed Central journal article supplement (PMC8932345)
Supplement: NIHMS1786406-supplement-figure_S1.pdf [file NIHMS1786406-supplement-figure_S1.pdf]

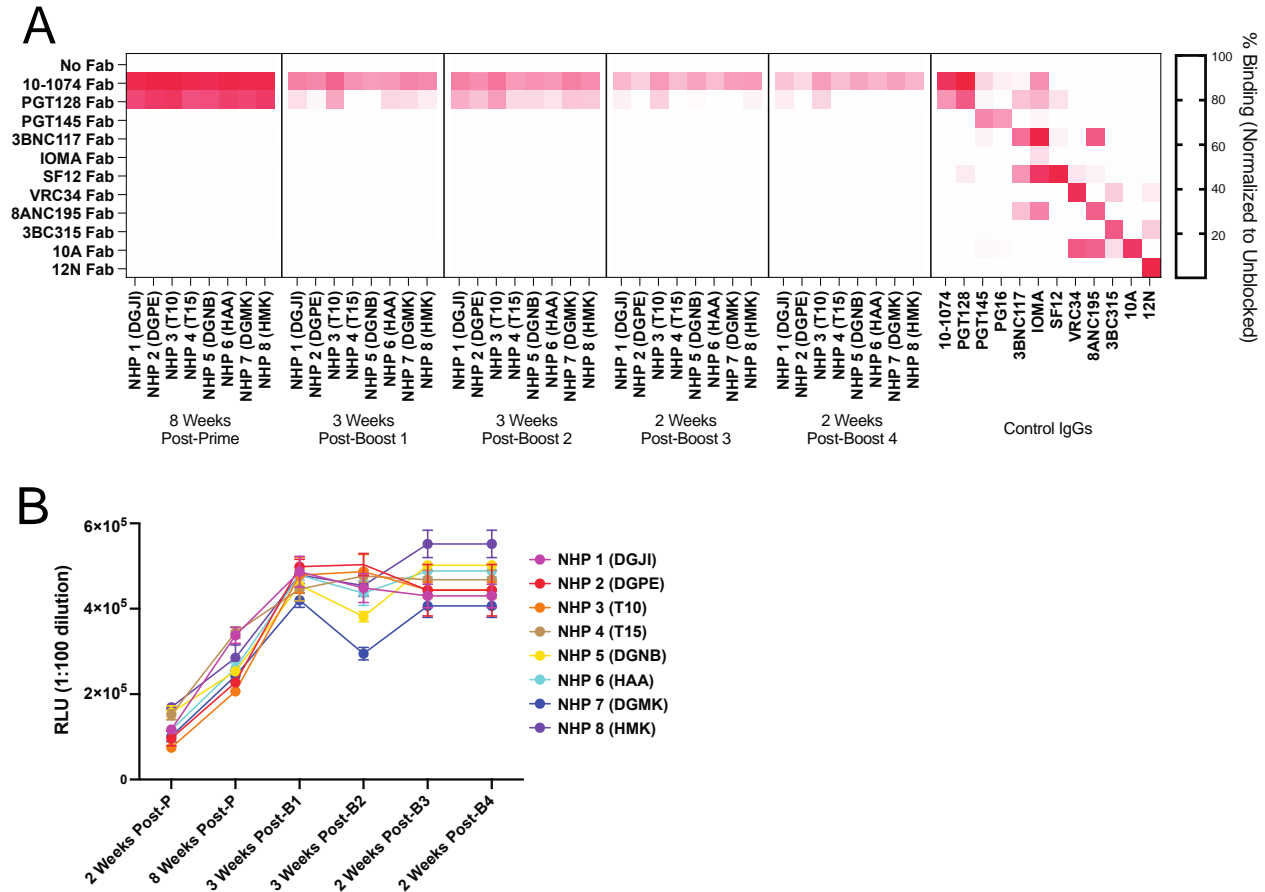

**Figure S1. Serum from immunized non-human primates (NHPs) competes with V3-glycan patch broadly neutralizing antibodies (bNAbs) by enzyme-linked immunoassays (ELISAs).** (A) A heat map shows results of competition experiments to map epitopes of serum IgGs derived from immunized NHPs. Randomly biotinylated RC1 was bound to a Streptavidin ELISA plate. Each well was then incubated with a potential competitor Fab for 2 hours and then a 1:100 dilution of serum or 2  $\mu$ g/mL control monoclonal Ab (mAb) was added. Bound IgGs were detected using an anti-Fc antiserum. The percent binding observed after addition of a competitor Fab was normalized to the binding in the absence of a competitor Fab. NHP serum results are shown on the left at different time points in the immunization regimen; control bNAb or non-neutralizing IgG (10A and 12N) results are shown on the right. (B) ELISA serum responses against RC1 are shown at the indicated time points.
