# Supplementary material
Source: PubMed Central journal article supplement (PMC8932345)
Supplement: NIHMS1786406-supplement-figure_S2.pdf [file NIHMS1786406-supplement-figure_S2.pdf]

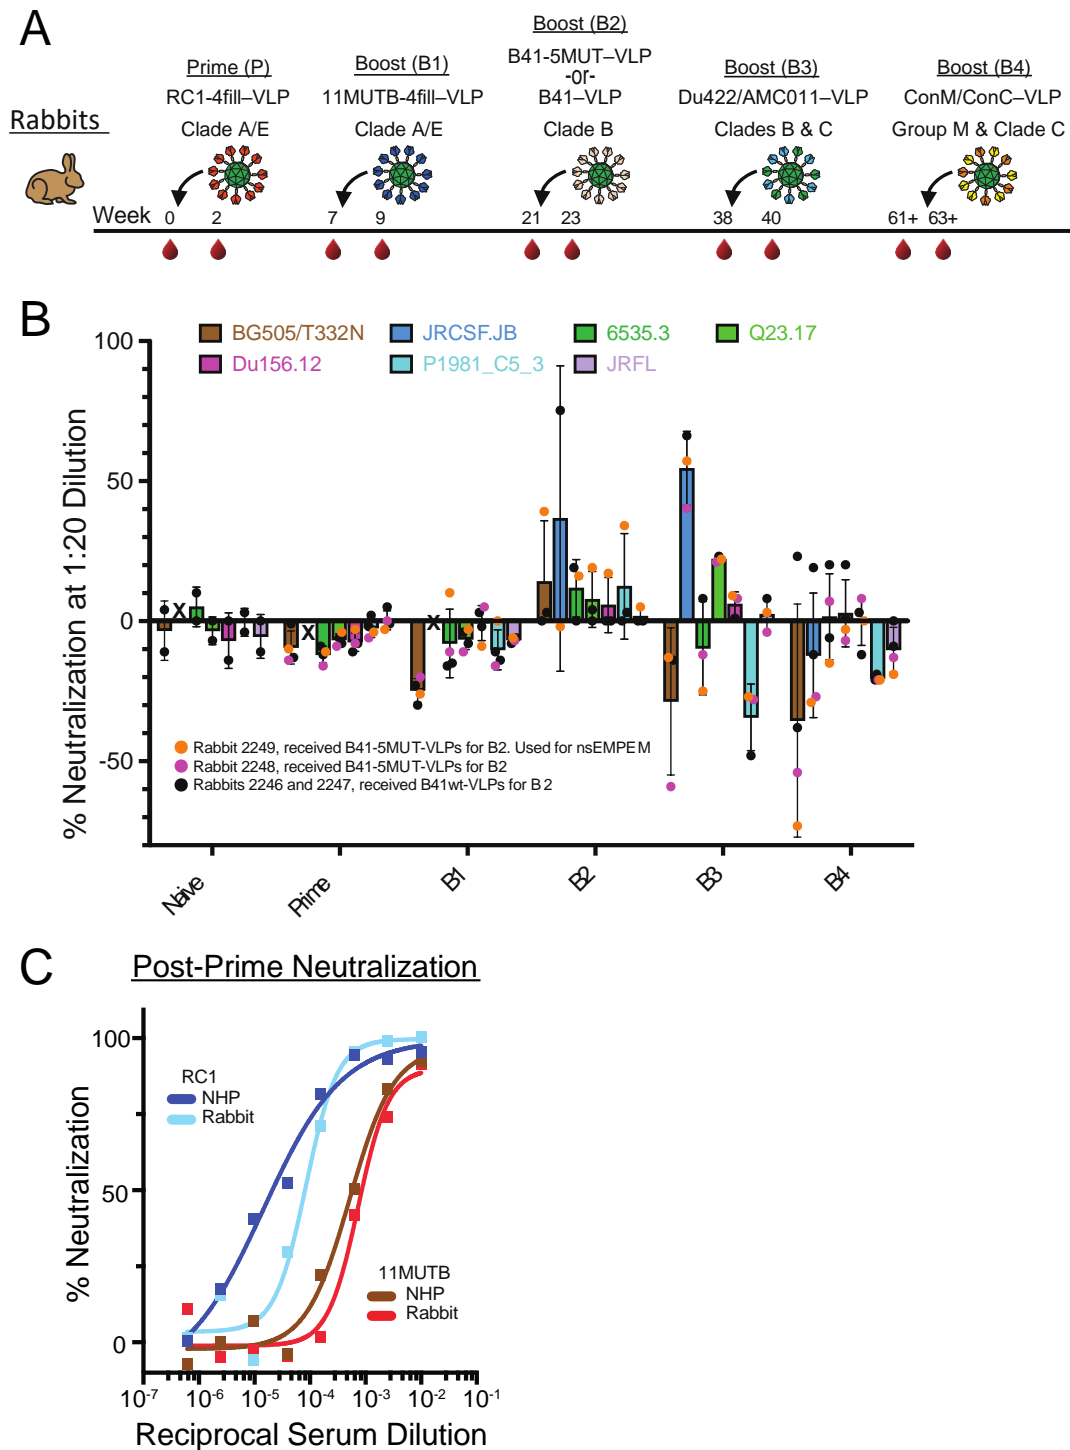

**Figure S2. Rabbits were immunized with a prime and four boosts and antibody responses were compared to NHP responses.**

(A) The sequential immunization regimen is shown. Rabbits were bled at the indicated times and other times noted in tables S1 and S2.

(B) Percent neutralization of rabbit serum samples at a 1:20 dilution against heterologous HIV-1 strains are shown for the indicated time points. Neutralization data for samples that exhibited
