# Supplementary material
Source: PubMed Central journal article supplement (PMC8932345)
Supplement: NIHMS1786406-supplement-figure_S2cont.pdf [file NIHMS1786406-supplement-figure_S2cont.pdf]

>15% neutralization of the control MLV or substantial cell toxicity/stress at a 1:20 dilution were excluded from analysis (rabbit 2248 B2, rabbit 2246 B3). Neutralization results were not available for the naïve, B1, and B2 samples (indicated by an X).

**(C)** Neutralization activities against RC1 and 11MUTB pseudoviruses of serum samples from an NHP and a rabbit after an RC1-4fill-VLP prime are shown. Both animals exhibited stronger neutralizing antibody responses to RC1 than to 11MUTB.
