# Supplementary material
Source: PubMed Central journal article supplement (PMC8932345)
Supplement: NIHMS1786406-supplement-figure_S3.pdf [file NIHMS1786406-supplement-figure_S3.pdf]

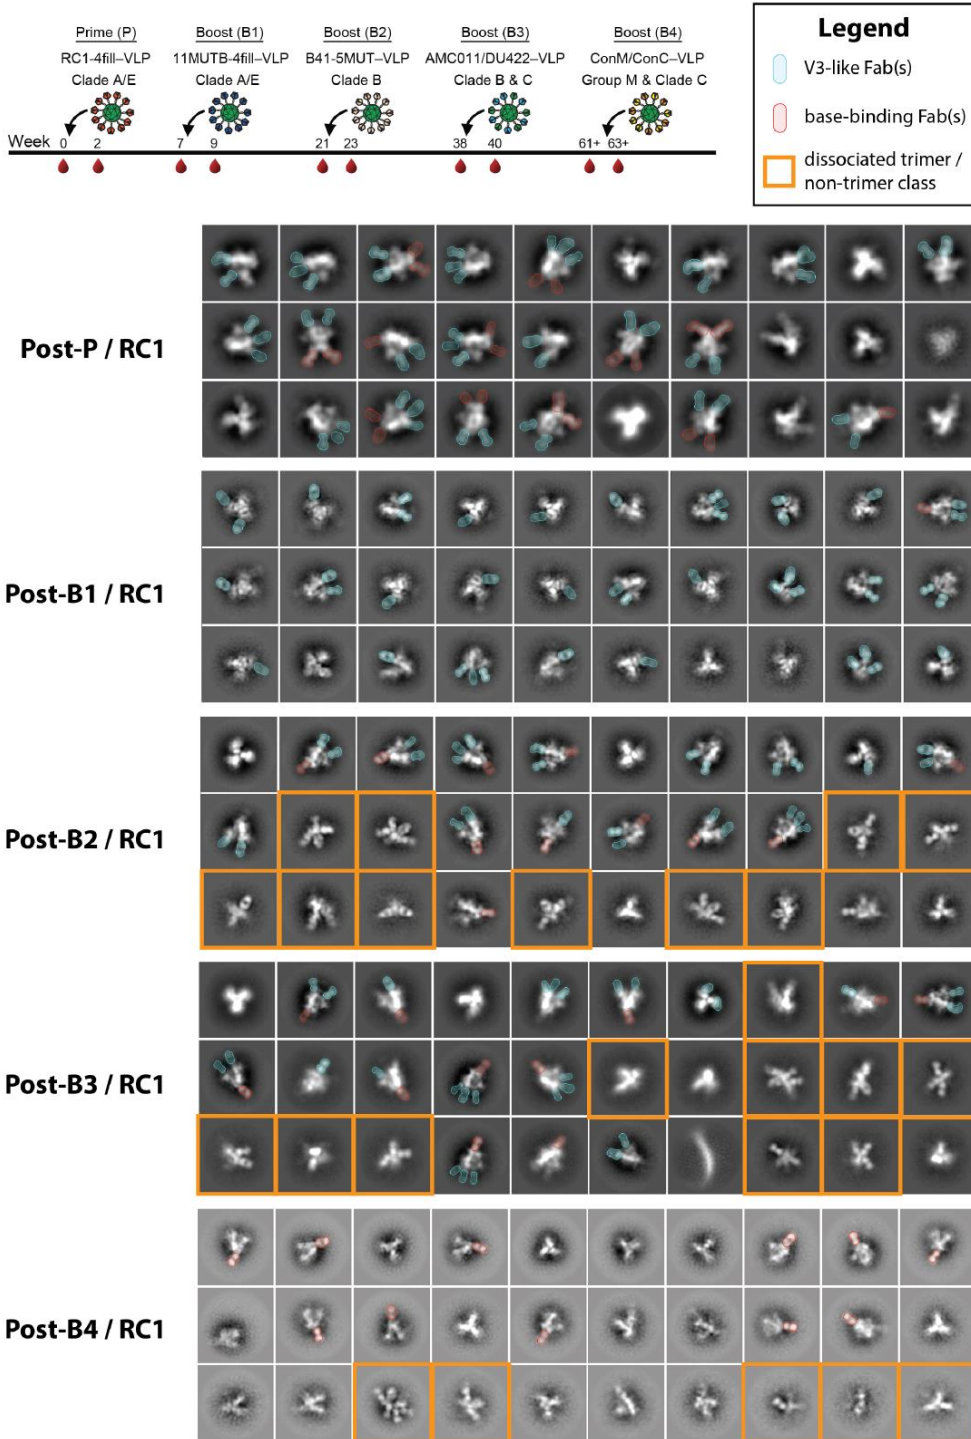

**Figure S3. 2D classes of Rabbit 2249 serum Fabs in complex with RC1 SOSIP.664 trimer show V3- and base-targeting Fab(s) as well as trimer dissociation.**

Top: The immunization schedule for Rabbit 2249 is shown. Bottom: The most populated negative-stain 2D classes are shown for polyclonal Fabs collected 2-weeks post-Prime, post-Boost 1, post-Boost 2, post-Boost 3, and post-Boost 4 in complex with a RC1 SOSIP.664 trimer. Fabs targeting the V3-glycan patch (cyan) and the base of the trimer (red) are highlighted in select 2D classes.
