# Supplementary material
Source: PubMed Central journal article supplement (PMC8932345)
Supplement: NIHMS1786406-supplement-figure_S3cont.pdf [file NIHMS1786406-supplement-figure_S3cont.pdf]

Disassociated gp140 protomer classes bound to Fabs identified in 2D classes after post-Boost 2, post-Boost 3, and post-Boost 4 are boxed in orange.
