# Supplementary material
Source: PubMed Central journal article supplement (PMC8932345)
Supplement: NIHMS1786406-supplement-figure_S5.pdf [file NIHMS1786406-supplement-figure_S5.pdf]

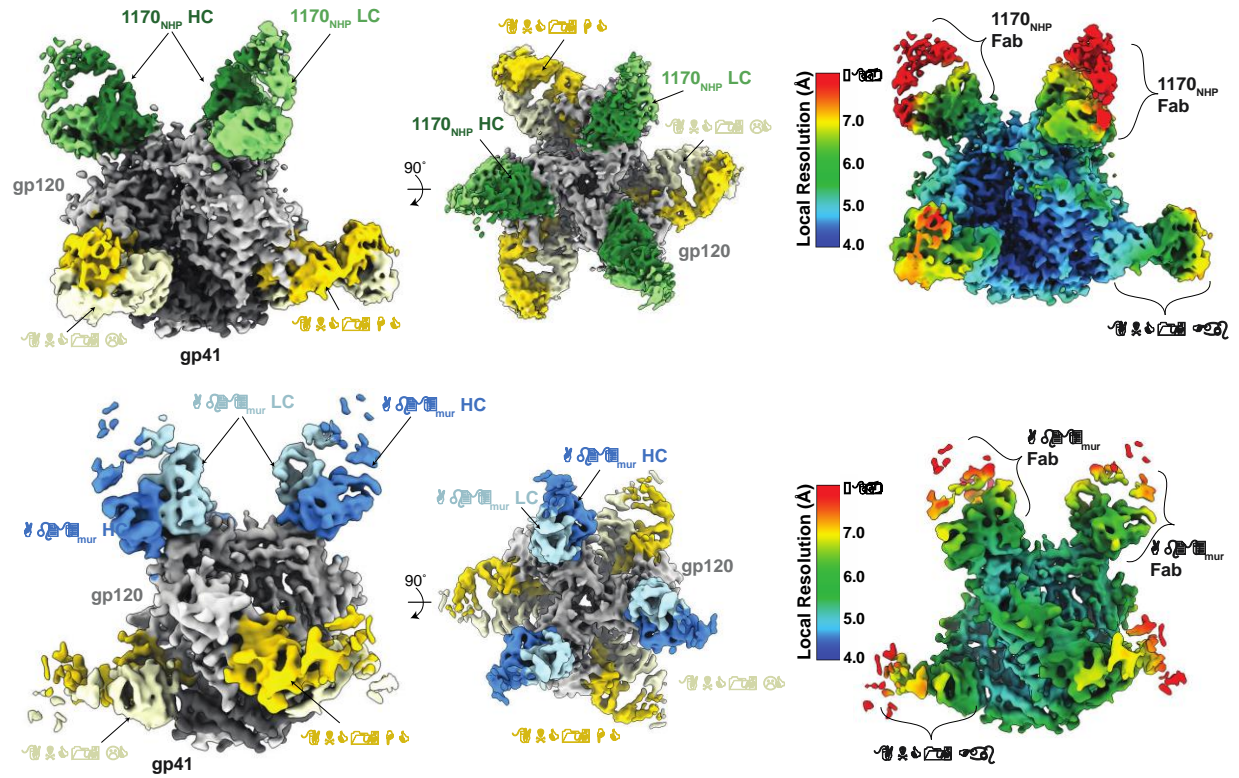

**Figure S5. Cryo-EM reconstructions and local resolution estimates for Ab283<sub>mur</sub>-RC1 and 1170<sub>NHP</sub>-RC1 complexes.**

Cryo-EM density and local resolution estimations were calculated in RELION v3.1 (113, 114) for (top) 1170<sub>NHP</sub> – RC1 and (bottom) Ab283<sub>mur</sub> – RC1 trimer complexes.
