# Supplementary material
Source: PubMed Central journal article supplement (PMC8932345)
Supplement: NIHMS1786406-supplement-figure_S6.pdf [file NIHMS1786406-supplement-figure_S6.pdf]

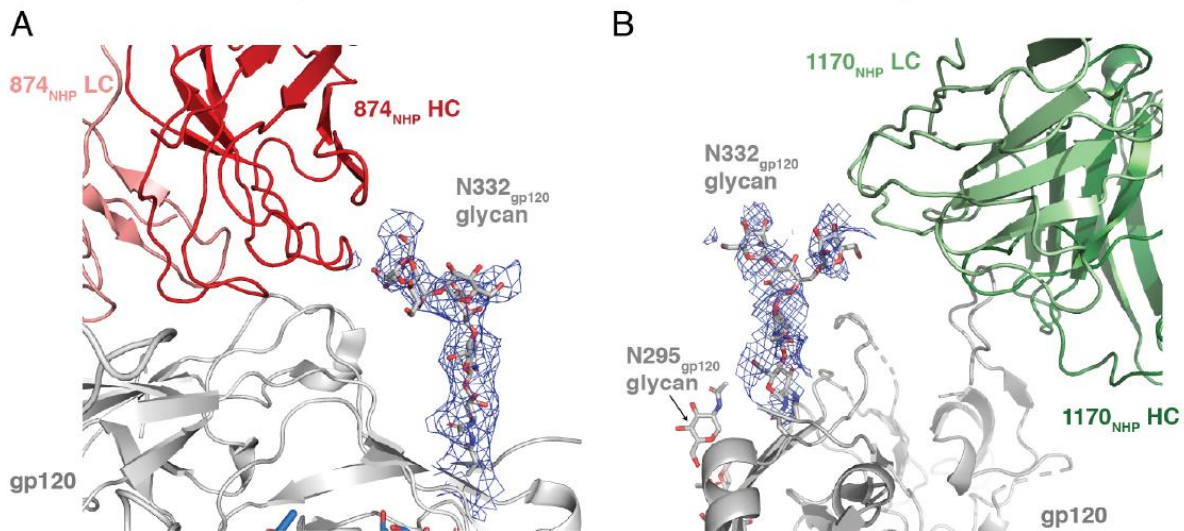

**Figure S6. Antibodies Ab874<sub>NHP</sub> and Ab1170<sub>NHP</sub> interact with the N332<sub>gp120</sub> glycan.** Antibodies (A) Ab874<sub>NHP</sub> and (B) Ab1170<sub>NHP</sub> elicited in NHPs after priming with RC1-4fill-VLPs (115) contact the high-mannose N-glycan attached to gp120 residue N332 (modeled from PDB 6ORO) (Ab874<sub>NHP</sub>) and this study (Ab1170<sub>NHP</sub>). Cryo-EM density for the N332<sub>gp120</sub> glycan is shown as blue mesh contoured at 4σ.
