# Supplementary material
Source: PubMed Central journal article supplement (PMC8932345)
Supplement: NIHMS1786406-supplement-figure_S7.pdf [file NIHMS1786406-supplement-figure_S7.pdf]

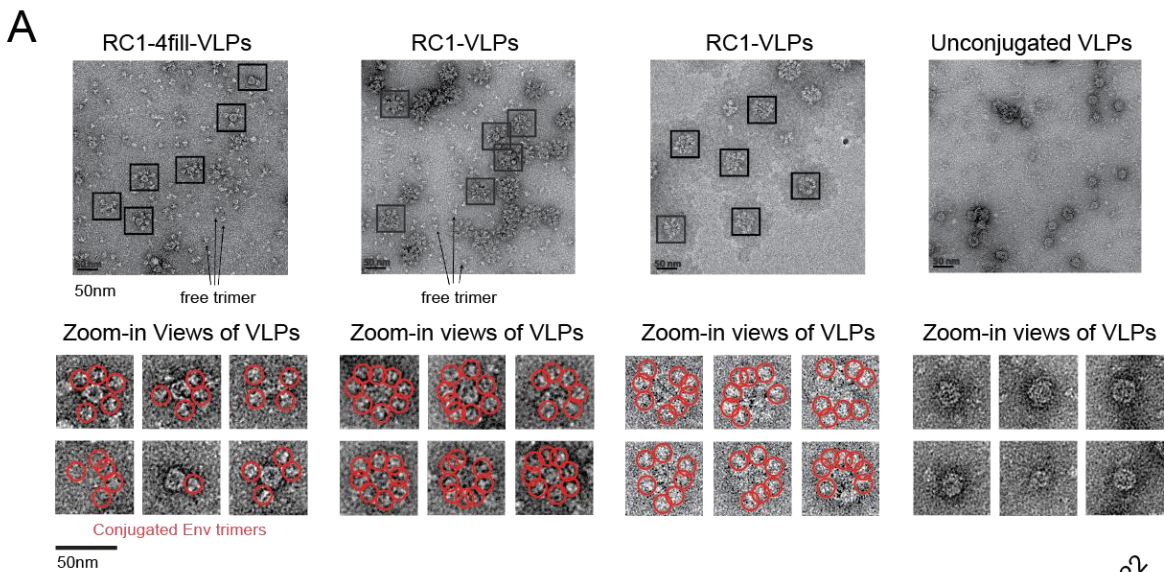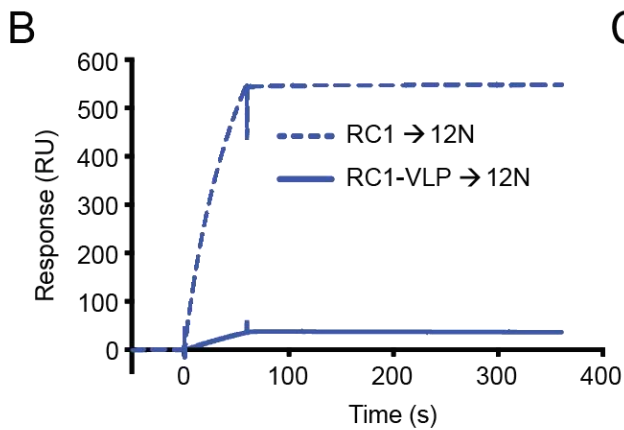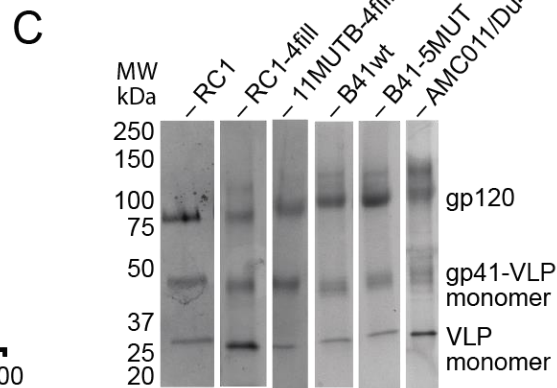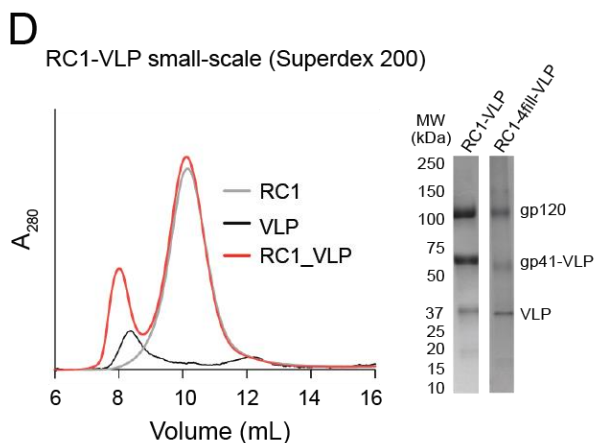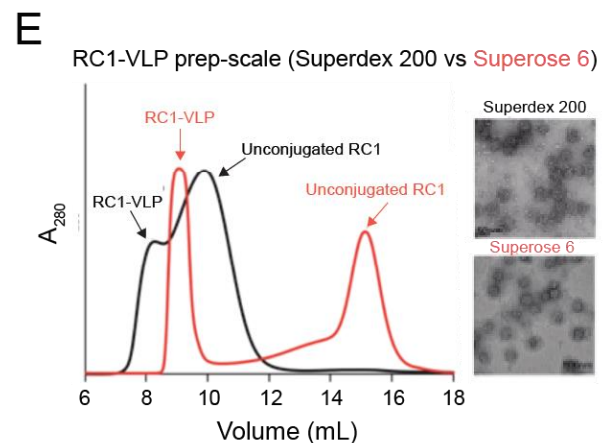

**Figure S7. Native-like Env trimer (SOSIP)-conjugated virus-like particles (VLPs) are characterized biochemically and by negative stain electron microscopy (nsEM).**

(A) Negative stain electron microscopy (nsEM) images comparing RC1-4fill-VLPs (left), RC1-VLPs with free trimer (second from left), RC1-VLPs without free trimer (third from left), and unconjugated VLPs (right) are shown. Bottom panels show zoom-in views with conjugated Env trimers indicated by red circles.
