# Supplementary material
Source: PubMed Central journal article supplement (PMC8932345)
Supplement: NIHMS1786406-supplement-table_S1.pdf [file NIHMS1786406-supplement-table_S1.pdf]

Table S1. Serum neutralization from immunized NHPs against RC1, 11MUTB, and indicated pseudovirus (PV) and replication competent virus (RC) simian-human immunodeficiency virus (SHIV) strains

|                     |                                |                        | RC1     | 11MUTB  | SHIV <sup>DH12-v3AD8</sup><br>(PV) | SHIV <sup>DH12-v3AD8</sup><br>(RC) | SHIV <sup>AD8EO</sup><br>(PV) | SHIV <sup>SF162.LS</sup><br>(PV) | SHIV <sup>SF162P3</sup><br>(RC) |
|---------------------|--------------------------------|------------------------|---------|---------|------------------------------------|------------------------------------|-------------------------------|----------------------------------|---------------------------------|
| NHP 1<br>(DGJI)     | Week 2 (P, RC1-4fill-VLP)      | 2 weeks Post Prime     | 400     | <100    | <20                                | <20                                | <20                           |                                  |                                 |
|                     | Week 8 (P, RC1-4fill-VLP)      | 8 weeks Post Prime     | 60,000  | 1,600   | 45                                 | 28                                 | NT                            |                                  |                                 |
|                     | Week 11 (B1, 11MUTB-4fill-VLP) | 2 weeks Post B1        | 100,000 | 60,000  | 50                                 | 36                                 | <20                           |                                  |                                 |
|                     | Week 25 (B2, B41-5MUT-VLP)     | 3 weeks Post B2        | 48,000  | 29,000  | 1,568                              | 53                                 | NT                            |                                  |                                 |
|                     | Week 41 (B3, Du422/AMC011-VLP) | 2 weeks Post B3        | 62,000  | 29,000  | 3,502                              | 59                                 | 21                            | >4860                            | <20                             |
|                     | Week 65 (B4, ConM/ConC-VLP)    | 2 weeks Post B4        | 57,000  | 11,000  | 1,687                              | 59                                 | NT                            |                                  |                                 |
|                     | Week 67 (Challenge)            | 2 weeks Post Challenge |         |         | 815                                | 26                                 |                               |                                  |                                 |
|                     | Week 72 (Challenge)            | 7 weeks Post Challenge |         |         | 328                                | 20                                 |                               |                                  |                                 |
| Week 75 (Challenge) | 10 weeks Post Challenge        |                        |         | 516     | 27                                 |                                    |                               |                                  |                                 |
| NHP 2<br>(DGPE)     | Week 2 (P, RC1-4fill-VLP)      | 2 weeks Post Prime     | 200     | <100    | <20                                | <20                                | <20                           |                                  |                                 |
|                     | Week 8 (P, RC1-4fill-VLP)      | 8 weeks Post Prime     | 10,000  | 1,200   | <20                                | <20                                | NT                            |                                  |                                 |
|                     | Week 11 (B1, 11MUTB-4fill-VLP) | 2 weeks Post B1        | 300,000 | 300,000 | 46                                 | 25                                 | <20                           |                                  |                                 |
|                     | Week 25 (B2, B41-5MUT-VLP)     | 3 weeks Post B2        | 550,000 | 390,000 | 3,373                              | 126                                | NT                            |                                  |                                 |
|                     | Week 41 (B3, Du422/AMC011-VLP) | 2 weeks Post B3        | 370,000 | 250,000 | 3,302                              | 92                                 | <20                           | >4860                            | <20                             |
|                     | Week 65 (B4, ConM/ConC-VLP)    | 2 weeks Post B4        | 140,000 | 140,000 | 5,215                              | 126                                | NT                            |                                  |                                 |
|                     | Week 67 (Challenge)            | 2 weeks Post Challenge |         |         | 1,369                              | 63                                 |                               |                                  |                                 |
|                     | Week 72 (Challenge)            | 7 weeks Post Challenge |         |         | >43,740                            | 648                                |                               |                                  |                                 |
| Week 75 (Challenge) | 10 weeks Post Challenge        |                        |         | 28,917  | 1,157                              |                                    |                               |                                  |                                 |
| NHP 3<br>(T10)      | Week 2 (P, RC1-4fill-VLP)      | 2 weeks Post Prime     | 250     | <100    | <20                                | 29                                 | <20                           |                                  |                                 |
|                     | Week 8 (P, RC1-4fill-VLP)      | 8 weeks Post Prime     | 6,500   | 350     | <20                                | 25                                 | NT                            |                                  |                                 |
|                     | Week 11 (B1, 11MUTB-4fill-VLP) | 2 weeks Post B1        | 100,000 | 50,000  | 54                                 | 43                                 | <20                           |                                  |                                 |
|                     | Week 25 (B2, B41wt-VLP)        | 3 weeks Post B2        | 100,000 | 60,000  | 1,003                              | 70                                 | NT                            |                                  |                                 |
|                     | Week 41 (B3, Du422/AMC011-VLP) | 2 weeks Post B3        | 90,000  | 59,000  | 2,864                              | 85                                 | <20                           | >4860                            | <20                             |
|                     | Week 65 (B4, ConM/ConC-VLP)    | 2 weeks Post B4        | 90,000  | 36,000  | 3,106                              | 122                                | NT                            |                                  |                                 |
|                     | Week 67 (Challenge)            | 2 weeks Post Challenge |         |         | 792                                | 21                                 |                               |                                  |                                 |
|                     | Week 72 (Challenge)            | 7 weeks Post Challenge |         |         | 10,169                             | 621                                |                               |                                  |                                 |
| Week 75 (Challenge) | 10 weeks Post Challenge        |                        |         | 16,258  | 2,125                              |                                    |                               |                                  |                                 |
| NHP 4<br>(T15)      | Week 2 (P, RC1-4fill-VLP)      | 2 weeks Post Prime     | 400     | 400     | <20                                | <20                                | <20                           |                                  |                                 |
|                     | Week 8 (P, RC1-4fill-VLP)      | 8 weeks Post Prime     | 75,000  | 8,000   | <20                                | <20                                | NT                            |                                  |                                 |
|                     | Week 11 (B1, 11MUTB-4fill-VLP) | 2 weeks Post B1        | 300,000 | 300,000 | 28                                 | <20                                | <20                           |                                  |                                 |
|                     | Week 25 (B2, B41wt-VLP)        | 3 weeks Post B2        | 130,000 | 70,000  | 1,345                              | 58                                 | NT                            |                                  |                                 |
|                     | Week 41 (B3, Du422/AMC011-VLP) | 2 weeks Post B3        | 150,000 | 58,000  | 8,308                              | 164                                | <20                           | >4860                            | <20                             |
|                     | Week 65 (B4, ConM/ConC-VLP)    | 2 weeks Post B4        | 140,000 | 39,000  | 9,953                              | 256                                | NT                            |                                  |                                 |
|                     | Week 67 (Challenge)            | 2 weeks Post Challenge |         |         | 14,096                             | 98                                 |                               |                                  |                                 |
|                     | Week 72 (Challenge)            | 7 weeks Post Challenge |         |         | >43,740                            | 588                                |                               |                                  |                                 |
| Week 75 (Challenge) | 10 weeks Post Challenge        |                        |         | >43,740 | 1,597                              |                                    |                               |                                  |                                 |
| NHP 5<br>(DGNB)     | Week 2 (P, RC1-4fill-VLP)      | 2 weeks Post Prime     | 400     | <100    | <20                                | <20                                | <20                           |                                  |                                 |
|                     | Week 8 (P, RC1-4fill-VLP)      | 8 weeks Post Prime     | 10,000  | 400     | <20                                | 54                                 | NT                            |                                  |                                 |
|                     | Week 11 (B1, 11MUTB-4fill-VLP) | 2 weeks Post B1        | 200,000 | 90,000  | 26                                 | 21                                 | <20                           |                                  |                                 |
|                     | Week 25 (B2, B41-5MUT-VLP)     | 3 weeks Post B2        | 63,000  | 35,000  | 1,717                              | 50                                 | NT                            |                                  |                                 |
|                     | Week 41 (B3, Du422/AMC011-VLP) | 2 weeks Post B3        | 84,000  | 48,000  | 2,245                              | 47                                 | <20                           | >4860                            | <20                             |
|                     | Week 71 (B4, ConM/ConC-VLP)    | 2 weeks Post B4        | 46,000  | 23,000  | 2,314                              | NT                                 | NT                            |                                  |                                 |
|                     | Week 73 (Challenge)            | 2 weeks Post Challenge |         |         | 1,248                              | 67                                 |                               |                                  |                                 |
| NHP 6<br>(HAA)      | Week 2 (P, RC1-4fill-VLP)      | 2 weeks Post Prime     | 200     | <100    | <20                                | 23                                 | <20                           |                                  |                                 |
|                     | Week 8 (P, RC1-4fill-VLP)      | 8 weeks Post Prime     | 10,000  | 1,000   | <20                                | <20                                | NT                            |                                  |                                 |
|                     | Week 11 (B1, 11MUTB-4fill-VLP) | 2 weeks Post B1        | 90,000  | 100,000 | 35                                 | 26                                 | <20                           |                                  |                                 |
|                     | Week 25 (B2, B41-5MUT-VLP)     | 3 weeks Post B2        | 79,000  | 78,000  | 3,121                              | 71                                 | NT                            |                                  |                                 |
|                     | Week 41 (B3, Du422/AMC011-VLP) | 2 weeks Post B3        | 75,000  | 47,000  | 4,070                              | 135                                | <20                           | >4860                            | <20                             |
|                     | Week 71 (B4, ConM/ConC-VLP)    | 2 weeks Post B4        | 95,000  | 26,100  | 2,229                              | 56                                 | NT                            |                                  |                                 |
| Week 73 (Challenge) | 2 weeks Post Challenge         |                        |         | 2,157   | 87                                 |                                    |                               |                                  |                                 |
| NHP 7<br>(DGMK)     | Week 2 (P, RC1-4fill-VLP)      | 2 weeks Post Prime     | 200     | <100    | <20                                | <20                                | <20                           |                                  |                                 |
|                     | Week 8 (P, RC1-4fill-VLP)      | 8 weeks Post Prime     | 10,000  | 400     | <20                                | <20                                | NT                            |                                  |                                 |
|                     | Week 11 (B1, 11MUTB-4fill-VLP) | 2 weeks Post B1        | 80,000  | 50,000  | 26                                 | <20                                | <20                           |                                  |                                 |
|                     | Week 25 (B2, B41wt-VLP)        | 3 weeks Post B2        | 130,000 | 51,000  | 584                                | 36                                 | NT                            |                                  |                                 |
|                     | Week 41 (B3, Du422/AMC011-VLP) | 2 weeks Post B3        | 88,000  | 40,000  | 1,814                              | 88                                 | <20                           | 1239                             | <20                             |
|                     | Week 71 (B4, ConM/ConC-VLP)    | 2 weeks Post B4        | 60,000  | 23,000  | 1,393                              | 39                                 | NT                            |                                  |                                 |
| Week 73 (Challenge) | 2 weeks Post Challenge         |                        |         | 1,461   | 57                                 |                                    |                               |                                  |                                 |
| NHP 8<br>(HMK)      | Week 2 (P, RC1-4fill-VLP)      | 2 weeks Post Prime     | 1000    | <100    | <20                                | 37                                 | <20                           |                                  |                                 |
|                     | Week 8 (P, RC1-4fill-VLP)      | 8 weeks Post Prime     | 10,000  | 500     | <20                                | <20                                | NT                            |                                  |                                 |
|                     | Week 11 (B1, 11MUTB-4fill-VLP) | 2 weeks Post B1        | 200,000 | 100,000 | 58                                 | 21                                 | <20                           |                                  |                                 |
|                     | Week 25 (B2, B41wt-VLP)        | 3 weeks Post B2        | 78,000  | 45,000  | 1,174                              | 62                                 | NT                            |                                  |                                 |
|                     | Week 41 (B3, Du422/AMC011-VLP) | 2 weeks Post B3        | 55,000  | 48,000  | 3,264                              | 111                                | <20                           | >4860                            | <20                             |
|                     | Week 71 (B4, ConM/ConC-VLP)    | 2 weeks Post B4        | 150,000 | 53,000  | 2,047                              | 58                                 | NT                            |                                  |                                 |
| Week 73 (Challenge) | 2 weeks Post Challenge         |                        |         | 1,931   | 59                                 |                                    |                               |                                  |                                 |
