# Supplementary material
Source: PubMed Central journal article supplement (PMC8932345)
Supplement: NIHMS1786406-supplement-table_S2.pdf [file NIHMS1786406-supplement-table_S2.pdf]

Table S2. Neutralization 50% inhibitory dose (ID<sub>50</sub>) and percent neutralization at a 1:20 dilution of serum from immunized NHPs against a panel of heterologous HIV strains

| Neutralization ID50 and % Neutralization at 1:20 dilution |        |                  |                 |                  |                 |                  |                 |                  |                 |                  |                 |                  |                 |                  |                 |                  |                 |                 |
|-----------------------------------------------------------|--------|------------------|-----------------|------------------|-----------------|------------------|-----------------|------------------|-----------------|------------------|-----------------|------------------|-----------------|------------------|-----------------|------------------|-----------------|-----------------|
| NHP 1 (DGJI)                                              |        |                  |                 |                  |                 |                  |                 |                  |                 |                  |                 |                  |                 |                  |                 |                  |                 |                 |
| NHP 2 (DGPE)                                              |        |                  |                 |                  |                 |                  |                 |                  |                 |                  |                 |                  |                 |                  |                 |                  |                 |                 |
| Virus                                                     | Clade  | Tier             | Week 25 (B2)    |                  | Week 41 (B3)    |                  | Week 42 (B3)    |                  | Week 65 (B4)    |                  | Week 25 (B2)    |                  | Week 41 (B3)    |                  | Week 42 (B3)    |                  | Week 65 (B4)    |                 |
|                                                           |        |                  | 3 weeks Post B2 | 2 weeks Post B3  | 3 weeks Post B2 | 2 weeks Post B3  | 3 weeks Post B3 | 2 weeks Post B4  | 3 weeks Post B2 | 2 weeks Post B3  | 3 weeks Post B2 | 2 weeks Post B3  | 3 weeks Post B3 | 2 weeks Post B4  | 3 weeks Post B2 | 2 weeks Post B3  | 3 weeks Post B3 | 2 weeks Post B4 |
| ID <sub>50</sub>                                          | % 1:20 | ID <sub>50</sub> | % 1:20          | ID <sub>50</sub> | % 1:20          | ID <sub>50</sub> | % 1:20          | ID <sub>50</sub> | % 1:20          | ID <sub>50</sub> | % 1:20          | ID <sub>50</sub> | % 1:20          | ID <sub>50</sub> | % 1:20          | ID <sub>50</sub> | % 1:20          |                 |
| BG505/T332N                                               | AE     | 2                | <20             | -12              | <50             | 15               | <20             | 19               | <20             | -15              | <20             | -2               | <50             | 5                | <20             | 20               | 34              | 62              |
| JRCSF.JB                                                  | B      | 2                | 180             | 84               | 165             | 69               | 169             | 88               | <20             | -6               | 352             | 97               | 152             | 70               | 228             | 90               | 236             | 96              |
| 6535.5                                                    | B      | 1B               | <20             | 14               | <50             | 33               | 38              | 58               | <20             | -25              | <20             | 2                | <50             | 11               | <20             | 46               | 45              | 62              |
| 92RW020.2                                                 | A      | 2                | <20             | 7                | <50             | 5                | <20             | 21               | <20             | 6                | <20             | 13               | <50             | 16               | <20             | 15               | <20             | 33              |
| Du422.1                                                   | C      | 2                |                 |                  |                 |                  | <20             | 4                | <20             | 2                |                 |                  |                 |                  | <20             | 5                | <20             | 12              |
| T250-4                                                    | AG     | 2                | <20             | 18               | <50             | 24               | <20             | 38               | <20             | -2               | <20             | -1               | <50             | 7                | <20             | 37               | 50              | 54              |
| Q23.17                                                    | A      | 1B               | <20             | -14              | <50             | 20               | <20             | 29               | <20             | 4                | <20             | -27              | <50             | -7               | <20             | 45               | <20             | 39              |
| Du156.12                                                  | C      | 2                | <20             | -13              | <50             | 5                | <20             | 0                | <20             | 0                | <20             | -13              | <50             | -11              | <20             | 0                | <20             | 0               |
| P1981_C5_3                                                | G      |                  |                 |                  | <50             | -19              | <20             | 24               | <20             | 25               |                 |                  | <50             | -13              | <20             | 17               | 28              | 59              |
| JRFL                                                      | B      | 2                | <20             | 26               |                 |                  | <20             | 31               | <20             | 18               | <20             | 37               |                 |                  | <20             | 39               | <20             | 42              |
| 0815.v3.c3                                                | A      |                  |                 |                  |                 |                  | <20             | 0                | <20             | -63              |                 |                  |                 |                  | <20             | 0                | <20             | -4              |
| 928-28                                                    | A      | 2                |                 |                  |                 |                  | <20             | 47               | <20             | -4               |                 |                  |                 |                  | <20             | 40               | <20             | 37              |
| MuLV                                                      |        |                  | <20             | 25               | <50             | 23               | <20             | 24               | <20             | -2               |                 |                  | <50             | -1               | <20             | 16               | <20             | 5               |

| Neutralization ID50 and % Neutralization at 1:20 dilution |        |                  |                 |                  |                 |                  |                 |                  |                 |                  |                 |                  |                 |                  |                 |                  |                 |                 |
|-----------------------------------------------------------|--------|------------------|-----------------|------------------|-----------------|------------------|-----------------|------------------|-----------------|------------------|-----------------|------------------|-----------------|------------------|-----------------|------------------|-----------------|-----------------|
| NHP 3 (T10)                                               |        |                  |                 |                  |                 |                  |                 |                  |                 |                  |                 |                  |                 |                  |                 |                  |                 |                 |
| NHP 4 (T15)                                               |        |                  |                 |                  |                 |                  |                 |                  |                 |                  |                 |                  |                 |                  |                 |                  |                 |                 |
| Virus                                                     | Clade  | Tier             | Week 25 (B2)    |                  | Week 41 (B3)    |                  | Week 42 (B3)    |                  | Week 65 (B4)    |                  | Week 25 (B2)    |                  | Week 41 (B3)    |                  | Week 42 (B3)    |                  | Week 65 (B4)    |                 |
|                                                           |        |                  | 3 weeks Post B2 | 2 weeks Post B3  | 3 weeks Post B2 | 2 weeks Post B3  | 3 weeks Post B3 | 2 weeks Post B4  | 3 weeks Post B2 | 2 weeks Post B3  | 3 weeks Post B2 | 2 weeks Post B3  | 3 weeks Post B3 | 2 weeks Post B4  | 3 weeks Post B2 | 2 weeks Post B3  | 3 weeks Post B3 | 2 weeks Post B4 |
| ID <sub>50</sub>                                          | % 1:20 | ID <sub>50</sub> | % 1:20          | ID <sub>50</sub> | % 1:20          | ID <sub>50</sub> | % 1:20          | ID <sub>50</sub> | % 1:20          | ID <sub>50</sub> | % 1:20          | ID <sub>50</sub> | % 1:20          | ID <sub>50</sub> | % 1:20          | ID <sub>50</sub> | % 1:20          |                 |
| BG505/T332N                                               | AE     | 2                | <20             | 29               | <50             | 13               | 22              | 52               | <20             | 33               | <20             | 42               | <50             | 29               | 28              | 55               | 48              | 48              |
| JRCSF.JB                                                  | B      | 2                | 23              | 59               | 99              | 65               | 108             | 88               | 45              | 73               | 43              | 66               | 440             | 86               | 343             | 95               | 257             | 96              |
| 6535.5                                                    | B      | 1B               | <20             | -25              | <50             | 27               | <20             | 47               | <20             | 45               | <20             | 9                | 73              | 53               | 122             | 79               | 129             | 88              |
| 92RW020.2                                                 | A      | 2                | <20             | -2               | <50             | 20               | <20             | 32               | <20             | 12               | <20             | 7                | <50             | 31               | <20             | 42               | <20             | 40              |
| Du422.1                                                   | C      | 2                |                 |                  |                 |                  | <20             | 16               | <20             | 6                |                 |                  |                 |                  | <20             | 16               | <20             | 0               |
| T250-4                                                    | AG     | 2                | <20             | -3               | <50             | 24               | 22              | 54               | <20             | 26               | <20             | -6               | <50             | 19               | 64              | 61               | 21              | 51              |
| Q23.17                                                    | A      | 1B               | <20             | -11              | <50             | 8                | <20             | 43               | <20             | 18               | <20             | -18              | <50             | 14               | 24              | 53               | <20             | 32              |
| Du156.12                                                  | C      | 2                | <20             | -15              | <50             | -7               | <20             | 0                | <20             | 0                | <20             | -15              | <50             | 14               | <20             | 27               | <20             | 0               |
| P1981_C5_3                                                | G      |                  |                 |                  | <50             | -1               | <20             | 29               | <20             | 17               |                 |                  | <50             | 11               | <20             | 42               | <20             | 29              |
| JRFL                                                      | B      | 2                | <20             | 10               |                 |                  | <20             | 41               | <20             | 13               | <20             | 13               |                 |                  | 29              | 60               | 65              | 66              |
| 0815.v3.c3                                                | A      |                  |                 |                  |                 |                  | <20             | 0                | <20             | -55              |                 |                  |                 |                  | <20             | 24               | <20             | 40              |
| 928-28                                                    | A      | 2                |                 |                  |                 |                  | <20             | 49               | <20             | 18               |                 |                  |                 |                  | 42              | 60               |                 |                 |
| MuLV                                                      |        |                  | <20             | 5                | <50             | 10               | <20             | 34               | <20             | 8                | <20             | 6                | <50             | 10               | <20             | 36               | <20             | 5               |

| Neutralization ID50 and % Neutralization at 1:20 dilution |        |                  |                 |                  |                 |                  |                 |                  |                 |                  |                 |                  |                 |                  |                 |                  |                 |                 |
|-----------------------------------------------------------|--------|------------------|-----------------|------------------|-----------------|------------------|-----------------|------------------|-----------------|------------------|-----------------|------------------|-----------------|------------------|-----------------|------------------|-----------------|-----------------|
| NHP 5 (DGNB)                                              |        |                  |                 |                  |                 |                  |                 |                  |                 |                  |                 |                  |                 |                  |                 |                  |                 |                 |
| NHP 6 (HAA)                                               |        |                  |                 |                  |                 |                  |                 |                  |                 |                  |                 |                  |                 |                  |                 |                  |                 |                 |
| Virus                                                     | Clade  | Tier             | Week 25 (B2)    |                  | Week 41 (B3)    |                  | Week 42 (B3)    |                  | Week 71 (B4)    |                  | Week 25 (B2)    |                  | Week 41 (B3)    |                  | Week 42 (B3)    |                  | Week 71 (B4)    |                 |
|                                                           |        |                  | 3 weeks Post B2 | 2 weeks Post B3  | 3 weeks Post B2 | 2 weeks Post B3  | 3 weeks Post B3 | 2 weeks Post B4  | 3 weeks Post B2 | 2 weeks Post B3  | 3 weeks Post B2 | 2 weeks Post B3  | 3 weeks Post B3 | 2 weeks Post B4  | 3 weeks Post B2 | 2 weeks Post B3  | 3 weeks Post B3 | 2 weeks Post B4 |
| ID <sub>50</sub>                                          | % 1:20 | ID <sub>50</sub> | % 1:20          | ID <sub>50</sub> | % 1:20          | ID <sub>50</sub> | % 1:20          | ID <sub>50</sub> | % 1:20          | ID <sub>50</sub> | % 1:20          | ID <sub>50</sub> | % 1:20          | ID <sub>50</sub> | % 1:20          | ID <sub>50</sub> | % 1:20          |                 |
| BG505/T332N                                               | AE     | 2                | <20             | 33               | <50             | 15               | <20             | 41               | 21              | 51               | <20             | -9               | <50             | 12               | <20             | 43               | <20             | 38              |
| JRCSF.JB                                                  | B      | 2                | 84              | 78               | 102             | 65               | 167             | 86               | 121             | 88               | 96              | 85               | 208             | 80               | 266             | 94               | 143             | 93              |
| 6535.5                                                    | B      | 1B               | <20             | 25               | <50             | 39               | 90              | 69               | 35              | 58               | <20             | -48              | <50             | 15               | 41              | 56               | <20             | 32              |
| 92RW020.2                                                 | A      | 2                | <20             | 12               | <50             | 20               | <20             | 31               | <20             | 13               | <20             | 9                | <50             | 22               | <20             | 32               | <20             | 8               |
| Du422.1                                                   | C      | 2                |                 |                  |                 |                  | <20             | 8                | <20             | -1               |                 |                  |                 |                  | <20             | 16               | <20             | -17             |
| T250-4                                                    | AG     | 2                | <20             | 11               | <50             | 7                | <20             | 36               | <20             | 15               | <20             | 19               | <50             | 28               | <20             | 39               | <20             | 11              |
| Q23.17                                                    | A      | 1B               | <20             | 26               | <50             | 4                | <20             | 32               | <20             | 1                | <20             | 16               | <50             | 27               | <20             | 46               | <20             | 12              |
| Du156.12                                                  | C      | 2                | <20             | 23               | <50             | -1               | <20             | 14               | <20             | 19               | <20             | 6                | <50             | 6                | <20             | 21               | <20             | 3               |
| P1981_C5_3                                                | G      |                  |                 |                  | <50             | 0                | <20             | 43               | <20             | 5                |                 |                  | <50             | 3                | <20             | 26               | <20             | 18              |
| JRFL                                                      | B      | 2                | <20             | 18               |                 |                  | <20             | 41               | <20             | 25               | <20             | 26               |                 |                  | <20             | 48               | <20             | 34              |
| 0815.v3.c3                                                | A      |                  |                 |                  |                 |                  | <20             | 0                |                 |                  |                 |                  |                 |                  | <20             | 0                |                 |                 |
| 928-28                                                    | A      | 2                |                 |                  |                 |                  | <20             | 46               |                 |                  |                 |                  |                 |                  | <20             | 46               |                 |                 |
| MuLV                                                      |        |                  | <20             | 18               | <50             | 16               | <20             | 16               | <20             | -2               | <20             | 22               | <50             | 23               | <20             | 29               | <20             | 5               |

| Neutralization ID50 and % Neutralization at 1:20 dilution |        |                  |                 |                  |                 |                  |                 |                  |                 |                  |                 |                  |                 |                  |                 |                  |                 |                 |
|-----------------------------------------------------------|--------|------------------|-----------------|------------------|-----------------|------------------|-----------------|------------------|-----------------|------------------|-----------------|------------------|-----------------|------------------|-----------------|------------------|-----------------|-----------------|
| NHP 7 (DGMK)                                              |        |                  |                 |                  |                 |                  |                 |                  |                 |                  |                 |                  |                 |                  |                 |                  |                 |                 |
| NHP 8 (HMK)                                               |        |                  |                 |                  |                 |                  |                 |                  |                 |                  |                 |                  |                 |                  |                 |                  |                 |                 |
| Virus                                                     | Clade  | Tier             | Week 25 (B2)    |                  | Week 41 (B3)    |                  | Week 42 (B3)    |                  | Week 71 (B4)    |                  | Week 25 (B2)    |                  | Week 41 (B3)    |                  | Week 42 (B3)    |                  | Week 71 (B4)    |                 |
|                                                           |        |                  | 3 weeks Post B2 | 2 weeks Post B3  | 3 weeks Post B2 | 2 weeks Post B3  | 3 weeks Post B3 | 2 weeks Post B4  | 3 weeks Post B2 | 2 weeks Post B3  | 3 weeks Post B2 | 2 weeks Post B3  | 3 weeks Post B3 | 2 weeks Post B4  | 3 weeks Post B2 | 2 weeks Post B3  | 3 weeks Post B3 | 2 weeks Post B4 |
| ID <sub>50</sub>                                          | % 1:20 | ID <sub>50</sub> | % 1:20          | ID <sub>50</sub> | % 1:20          | ID <sub>50</sub> | % 1:20          | ID <sub>50</sub> | % 1:20          | ID <sub>50</sub> | % 1:20          | ID <sub>50</sub> | % 1:20          | ID <sub>50</sub> | % 1:20          | ID <sub>50</sub> | % 1:20          |                 |
| BG505/T332N                                               | AE     | 2                | <20             | 0                | <50             | 12               | <20             | 20               | <20             | 10               | <20             | 19               | <50             | 20               | <20             | 40               | <20             | 19              |
| JRCSF.JB                                                  | B      | 2                | <20             | 29               | <50             | 44               | 60              | 74               | 20              | 51               | 80              | 69               | 85              | 61               | 118             | 88               | 96              | 87              |
| 6535.5                                                    | B      | 1B               | <20             | -55              | <50             | -9               | <20             | 46               | <20             | -16              | <20             | 16               | <50             | 26               | 143             | 67               | 20              | 50              |
| 92RW020.2                                                 | A      | 2                | <20             | 22               | <50             | 22               | <20             | 29               | <20             | -2               | <20             | 26               | <50             | 29               | <20             | 45               | <20             | 26              |
| Du422.1                                                   | C      | 2                |                 |                  |                 |                  | <20             | 13               | <20             | 6                |                 |                  |                 |                  | <20             | 24               | <20             | 11              |
| T250-4                                                    | AG     | 2                | <20             | 28               | <50             | 20               | <20             | 37               | <20             | 8                | <20             | 26               | <50             | 31               | 26              | 52               | <20             | 23              |
| Q23.17                                                    | A      | 1B               | <20             | 22               | <50             | 21               | <20             | 39               | <20             | 6                | <20             | 12               | <50             | 21               | <20             | 40               | <20             | 11              |
| Du156.12                                                  | C      | 2                | <20             | 17               | <50             | 6                | <20             | 32               | <20             | 24               | <20             | -22              | <50             | 20               | <20             | 45               | <20             | 16              |
| P1981_C5_3                                                | G      |                  |                 |                  | <50             | -13              | <20             | 48               | <20             | 14               |                 |                  | <50             | -7               | <20             | 30               | <20             | 17              |
| JRFL                                                      | B      | 2                | <20             | 14               |                 |                  | <20             | 37               | <20             | 12               | <20             | 36               |                 |                  | <20             | 47               | <20             | 25              |
| 0815.v3.c3                                                | A      |                  |                 |                  |                 |                  | <20             | 0                |                 |                  |                 |                  |                 |                  | <20             | 6                |                 |                 |
| 928-28                                                    | A      | 2                |                 |                  |                 |                  | <20             | 40               |                 |                  |                 |                  | <50             | 6                | 28              | 62               |                 |                 |
| MuLV                                                      |        |                  | <20             | 5                | <50             | 20               | <20             | 19               | <20             | 8                |                 |                  | <50             | 21               | <20             | 41               | <20             | 5               |
