# Supplementary material
Source: PubMed Central journal article supplement (PMC8932345)
Supplement: NIHMS1786406-supplement-table_S3.pdf [file NIHMS1786406-supplement-table_S3.pdf]

Table S3. Electron microscopy (EM) data collection and processing statistics

|                                                 | Ab283 <sup>mur</sup> -<br>RC1-<br>8ANC195 | Ab1170 <sup>NHP</sup> -<br>RC1-<br>8ANC195 | NHP post-P / RC1 | NHP post-B1 / RC1 | Rabbit post-B2 / B41 |
|-------------------------------------------------|-------------------------------------------|--------------------------------------------|------------------|-------------------|----------------------|
| <b>EMD</b>                                      | <b>24853</b>                              | <b>24854</b>                               | <b>24860</b>     | <b>24861</b>      | <b>-</b>             |
| <b>Data collection conditions</b>               |                                           |                                            |                  |                   |                      |
| Sample                                          | cryo                                      | cryo                                       | negative stain   | negative stain    | negative stain       |
| Microscope                                      | Talos Arctica                             | Talos Arctica                              | Talos Arctica    | Talos Arctica     | Talos Arctica        |
| Camera                                          | Falcon 3EC                                | Gatan K3 Summit                            | Gatan K3 Summit  | Gatan K3 Summit   | Gatan K3 Summit      |
| Magnification                                   | 92,000x                                   | 45,000x                                    | 28,000x          | 28,000x           | 28,000x              |
| Voltage (kV)                                    | 200                                       | 200                                        | 200              | 200               | 200                  |
| Recording mode                                  | counting                                  | counting                                   | counting         | counting          | counting             |
| Dose rate (e <sup>-</sup> /pixel/s)             | 1.06                                      | 12.7                                       |                  |                   |                      |
| Electron dose (e <sup>-</sup> /Å <sup>2</sup> ) | 39.2                                      | 60                                         | 10               | 10                | 15                   |
| Defocus range (μm)                              | 1.2 – 3.0                                 | 1.0 – 2.5                                  | 1.0 - 1.5        | 1.0 - 1.5         | 0.5 - 2.0            |
| Pixel size (Å)                                  | 1.145                                     | 0.8972                                     | 1.437            | 1.437             | 1.437                |
| Micrographs collected                           | 365                                       | 1,151                                      | 483              | 1,399             | 1,329                |
| Micrographs used                                | 346                                       | 1,079                                      | 423              | 1,260             | 1,329                |
| Total extracted particles                       | 92,225                                    | 170,550                                    | 180,049          | 909,046           | 633,617              |
| Refined particles                               | 41,961                                    | 91,166                                     |                  |                   |                      |
| Particles in final reconstruction               | 8,469                                     | 91,166                                     | 9,757            | 55,890            | 42,248               |
| Symmetry imposed                                | C3                                        | C1                                         | C1               | C3                | C1                   |
| FSC=0.143 Resolution (Å)                        | 5.2                                       | 4.5                                        | -                | -                 | -                    |

  

|                                                 | Rabbit post-P / RC1          | Rabbit post-B1 / RC1            | Rabbit post-B2 / RC1            | Rabbit post-B3 / RC1            | Rabbit post-B4 / RC1            |
|-------------------------------------------------|------------------------------|---------------------------------|---------------------------------|---------------------------------|---------------------------------|
| <b>EMD</b>                                      | <b>24855</b>                 | <b>24856</b>                    | <b>24857</b>                    | <b>24858</b>                    | <b>24859</b>                    |
| <b>Data collection conditions</b>               |                              |                                 |                                 |                                 |                                 |
| Microscope                                      | negative stain<br>Tecnai T12 | negative stain<br>Talos Arctica | negative stain<br>Talos Arctica | negative stain<br>Talos Arctica | negative stain<br>Talos Arctica |
| Camera                                          | Gatan Ultrascan 2k X 2k CCD  | Gatan K3 Summit                 | Gatan K3 Summit                 | Gatan K3 Summit                 | Gatan K3 Summit                 |
| Magnification                                   | 56,000x                      | 28,000x                         | 28,000x                         | 28,000x                         | 28,000x                         |
| Voltage (kV)                                    | 120                          | 200                             | 200                             | 200                             | 200                             |
| Recording mode                                  | linear                       | counting                        | counting                        | counting                        | counting                        |
| Dose rate (e <sup>-</sup> /pixel/s)             |                              |                                 |                                 |                                 |                                 |
| Electron dose (e <sup>-</sup> /Å <sup>2</sup> ) | 10                           | 15                              | 15                              | 15                              | 15                              |
| Defocus range (μm)                              | 1.0-1.5                      | 0.5 - 3.5                       | 0.5 - 3.5                       | 0.5 - 2.0                       | 0.5 - 2.0                       |
| Pixel size (Å)                                  | 2.06                         | 1.437                           | 1.437                           | 1.437                           | 1.437                           |
| Micrographs collected                           | 265                          | 1,186                           | 822                             | 1,745                           | 877                             |
| Micrographs used                                | 172                          | 357                             | 593                             | 1,138                           | 252                             |
| Total extracted particles                       | 18,290                       | 259,911                         | 624,021                         | 820,444                         | 61,022                          |
| Refined particles                               |                              |                                 |                                 |                                 |                                 |
| Particles in final reconstruction               | 12,842                       | 20,549                          | 8,871                           | 14,876                          | 9,854                           |
| Symmetry imposed                                | C3                           | C1                              | C1                              | C1                              | C1                              |
| FSC=0.143 Resolution (Å)                        | -                            | -                               | -                               | -                               | -                               |
