# Supplementary material
Source: PubMed Central journal article supplement (PMC8932345)
Supplement: NIHMS1786406-supplement-table_S4.pdf [file NIHMS1786406-supplement-table_S4.pdf]

Table S4. VDJ Assignments and sequences of antibodies from immunized NHPs and mice

| Heavy chain VDJ genes (IGH) |           |          |             |                    |                                                                                                                        | VH Protein Sequence                                                                                                       |       |       |
|-----------------------------|-----------|----------|-------------|--------------------|------------------------------------------------------------------------------------------------------------------------|---------------------------------------------------------------------------------------------------------------------------|-------|-------|
| Sequence ID                 | V-GENE    | D-GENE   | J-GENE      | CDR3-IMGT          | CDRH3 Length                                                                                                           | CDRH1                                                                                                                     | CDRH2 | CDRH3 |
| Ab1271                      | V4-92*01  | D2-15*01 | J4*01       | AAPDCSGPDCSPGFDY   | 16                                                                                                                     | QVQLVESGPGLVKPESETLSLCAVSGDSISSTWMMIRQPPKGLWIGRIISGDDGNTDYSPLKSRVTISDTSTKNQLSLRLTSVAADTAAYVYCAAPDCSG—PDCSPGFDYWGQGVLTIVSS |       |       |
| Ab1289                      | V5-43*01  | D3-9*01  | J4*01       | SKARYEDEYGYYSYDYGY | 18                                                                                                                     | QVQLVQSGAEVKKRAGESLRISCKTSGYIFSDGWIDWRQMPGRGLEWMSIYPGDSERYNPFQGHVITSAOKSISTIYLOWSSKASDATTAYYCSKARYEDEYGYYSYDYWGQGVLTIVSS  |       |       |
| Ab1303                      | V4-160*01 | D2-27*01 | J4*01       | ARRDTRFWRGIVYVFEF  | 16                                                                                                                     | QVQLQESGPGLVKPESETLSLCAVSGGSIQNYWSWIRQSPKGLWIGIINDYSGRDYNPDKSRVTISDTSTNOFFLTLSSVSAADTAAYVYCARRDTRF—WRGIYVFEFYGQGVLTIVSS   |       |       |
| Ab1368                      | V4-143*01 | D6-31*01 | J4*01       | ARCIVAAGTFYFDY     | 14                                                                                                                     | EVQLVQSGPAVVKPSETLSLCAVSGGSIQNYWSWIRQSPKGLWIGIISGSGSYNPNPKLRTVITISKDTSKNQISLKLSSVTAADTAAYVYCARCIVAA—GTFYFDYWGQGVLTIVSS    |       |       |
| Ab1415                      | V5-43*01  | D5-12*01 | J4*01       | TIPDADNFNSPYFDY    | 15                                                                                                                     | EVQLVQSGAEVKKRPGESLMSKTSYSGVFTDITWISWVRQTPKGLWIGIISGSGSYNPNPKLRTVITISKDTSKNQISLKLSSVTAADTAAYVYCARCIVAA—GTFYFDYWGQGVLTIVSS |       |       |
| Ab1456                      | V5-43*02  | D2-33*01 | J6*01       | AKWGVDCSDSGCSAFDS  | 18                                                                                                                     | EVQLVQSGAEVKKRPGESLMSKTSYSGVFTDITWISWVRQTPKGLWIGIISGSGSYNPNPKLRTVITISKDTSKNQISLKLSSVTAADTAAYVYCARCIVAA—GTFYFDYWGQGVLTIVSS |       |       |
| Ab1457                      | V4-147*01 | D3-3*01  | J4*01       | ASPFCSTTSCHPSPFDY  | 16                                                                                                                     | QVQLVQSGAEVKKRPGESLMSKTSYSGVFTDITWISWVRQTPKGLWIGIISGSGSYNPNPKLRTVITISKDTSKNQISLKLSSVTAADTAAYVYCARCIVAA—GTFYFDYWGQGVLTIVSS |       |       |
| Ab1461                      | V5-43*01  | D5-24*01 | J4*01       | GRIDGNGSFDD        | 12                                                                                                                     | QVQLVQSGAEVKKRPGESLMSKTSYSGVFTDITWISWVRQTPKGLWIGIISGSGSYNPNPKLRTVITISKDTSKNQISLKLSSVTAADTAAYVYCARCIVAA—GTFYFDYWGQGVLTIVSS |       |       |
| Ab1573                      | V1-198*02 | D4-29*01 | J5-2*02     | ARVGDVRFSGYAMDV    | 15                                                                                                                     | QVQLVQSGAEVKKRPGASVSKASGFTFGYRFTWVRQAPQGLWVGIPLVGVNLSAKKFKGRVITADTNTVYMDLSSLRSEDATVAYVYCARVGDVRF—GSGYAMDVWGRGALVTIVSS     |       |       |
| Ab874NHP                    | V3-103*01 | D6-43*01 | J1*01       | AKSPWGQSTSEYFEF    | 16                                                                                                                     | EVQLVETGGVLVQPGSLKLSCAASGFTFSYQGMWVRQAPKGLWVSGINSGGTKYYADSVKGRFTISRDNKNTLSLQMSLRAEDATVAYVYCAKSPWGQ—STSEYFEFVWQGVLTIVSS    |       |       |
| Ab1170NHP                   | V1-111*02 | D2-39*02 | J4*01       | ARGGGHSFDF         | 11                                                                                                                     | QVQLVQSGAEVKKRPGASVSKASGFTFDHFLHWVRQAPKGLWVSGVDPEDGEADYAKFDQRVAITADMSTDAYMELSSLRPEDATVAYVYCARGG—GHSSDFWQGVLTIVSS          |       |       |
| Ab275mur                    | VH5-6*01  | D1-1*01  | J4*01       | ARHGTTTGVAMDY      | 14                                                                                                                     | EVQLQESGGDLVQPGSLKLSCAASGFTFSRYGMSWVRQTPDKRLWEVATISSGGSYTYYPDSVKGKFTISRDNKNTLSLQMSLRAEDATVAYVYCARHGITT—VGVAMDYWGQGVLTIVSS |       |       |
| Ab283mur                    | VH5-6*01  | D1-1*01  | J3*01       | ARHEHYFGSSSHFAY    | 15                                                                                                                     | EVKLVESSGDLVMPGSLKLSCAASGFTFNSYGMWVRQTPDKRLWEVATISSGGSYTYYPDSVKGKFTISRDNKNTLSLQMSLRAEDATVAYVYCARHEHYF—GSSSHFAYWGQGVLTIVSS |       |       |
| Light chain VJ genes        |           |          |             |                    |                                                                                                                        | VL Protein Sequence                                                                                                       |       |       |
| Sequence ID                 | V-GENE    | J-GENE   | CDR3-IMGT   | CDRL3 Length       | CDRL1                                                                                                                  | CDRL2                                                                                                                     | CDRL3 |       |
| Ab1271                      | LV1-85*01 | LJ3*01   | QSYDSSMSAHL | 12                 | -QPVLTOPPSVSGAPQQRVTISCTGSSS-DIGR-FYVQVYQQLPGTAPKLLIYEN—TKRPSGIDRFSGSISGSPASLTIITGLQSEDEADYYCQSYDSSMSAHLFGGGTRLTIVL    |                                                                                                                           |       |       |
| Ab1289                      | LV1-72*01 | LJ2A*01  | SAWINDLGGPV | 11                 | -QSVLTQPHSVSGAPQSVTISCTGSSS-NIET-NYVYVYQQLSGRAPKLLIYNN—DQRPSGVDRFSGSISGTSASLAIISGLQSEDEADYYCSAWINDLGGPV-FGGGTRLTIVL    |                                                                                                                           |       |       |
| Ab1303                      | LV4-97*01 | LJ1*01   | QVWTTGIYI   | 9                  | -QSVLTQPSASASLQASVKTCTLSGG-LSR-YTIAWYQRRGQAPFLRLRLDSVGSHTKVDGIPDRFSGSISGTERLYTISGLQSEDEADYYCQVWTTGIYI—YIFGGGTRLSVL     |                                                                                                                           |       |       |
| Ab1368                      | LV2-32*01 | LJ2A*01  | CSYAGSYTWV  | 10                 | -QSALTQPRSVSGSPGQSVTISCTGSSS-DIGGYNVYVYQVQHPGTAPKLLIYAV—SKRPSGVDRFSGSISGTSASLTIITGLQAEDEADYYCSYAGSYT—WVFGGTRLTIVL      |                                                                                                                           |       |       |
| Ab1415                      | LV1-85*01 | LJ6*01   | QSYDSTLNAHV | 11                 | -QLVLTQPPSVSGAPQQRVTISCTGSSS-NIGP-YFVQVYQQLPGTAPKLLIYEN—NKRPSGVDRFSGSISGSDTSASLTIITGLQAEDEADYYCQSYDSTLNAHV-FGSGTKLTIVL |                                                                                                                           |       |       |
| Ab1456                      | LV1-85*01 | LJ6*01   | QSYDSTLNAHV | 11                 | -QSVLTQPPSVSGAPQQRVTISCTGSSS-NIGP-YFVQVYQQLPGTAPKLLIYEN—NKRPSGVDRFSGSISGSDTSASLTIITGLQAEDEADYYCQSYDSTLNAHV-FGSGTKLTIVL |                                                                                                                           |       |       |
| Ab1457                      | LV1-85*01 | LJ2*01   | QSFDNPSAHL  | 12                 | -NFMLTQPPSVSGAPQQRVTISCTGSSS-NMGD-YFVQVYQQLPGTAPKLLIYEN—TKRPSGVDRFSGSISGSDTSASLTIITGLQAEDEADYYCQSFDNPSAHLFGGGTRLTIVL   |                                                                                                                           |       |       |
| Ab1461                      | LV1-64*02 | LJ2A*01  | LSYDSSLGWL  | 11                 | -QSVLTQPPSVSGAPQQRVTISCTGSSS-NIGD-YFVQVYQQLPGTAPKLLIYQY—NKRPSGVDRFSGSISGSDTSASLTIITGLQAEDEADYYCLSYDSSLGWL-FGGGTRLTIVL  |                                                                                                                           |       |       |
| Ab1573                      | LV1-64*01 | LJ2A*01  | QSYDSSLTYW  | 11                 | -QSALTQPPSVSGAPQQRVTISCTGSSS-NFEY-SFVYVYQVQHPGTAPKLLIYDN—YKRPSGVDRFSGSISGSDTSASLTIITGLQAEDEADYYCQSYDSSLTYW-FGGGTRLTIVL |                                                                                                                           |       |       |
| Ab874NHP                    | LV3-34*01 | LJ3*01   | QWDSSTLHPL  | 11                 | -QSVLTQPPSVSVSQQTARITCGDN—IGS-EAVQVYQKPAQVPLVIYDD—SERPSGIDRFSGSISGNTATLITISGVEAGDEADYYCQWDSSTLHPLFGGGTRLTIVL           |                                                                                                                           |       |       |
| Ab1170NHP                   | LV2-32*02 | LJ2A*01  | SSYAGINTLV  | 10                 | -QSVLTQPPSVSGSPGQSVTISCTGSSS-DIGGYNVYVYQVQHPGTAPKLLIYEV—SKRPSGVDRFSGSISGNTASLTIITGLQAEDEADYYCSSYAGINTLV-FVGGGTRLTIVL   |                                                                                                                           |       |       |
| Ab275mur                    | KV3-4*01  | KJ5*01   | QNSNEDPYT   | 9                  | DIIVMTQSPASLAVSLQQRATISCKASQSVQYDGDVYNNYQKPGOPKLLIYAA—SNLESGIPARFSGSISGSDFTLNIHPVEEADAATYVYQNSNEDPY—YTFGAGTKLELK       |                                                                                                                           |       |       |
| Ab283mur                    | KV3-4*01  | KJ4*01   | HQSYEDPFT   | 9                  | QIVLQTPSVLAVSLQQRATISCKASQSVQYDGDVYNNYQKPGOPKLLIYAA—SNLESGIPARFSGSISGSDFTLNIHPVEEADAATYVYHQSIEDPFT—FTFGAGTKLELK        |                                                                                                                           |       |       |
